# Supplementary material for: Rapid and scalable personalized ASO screening in patient-derived organoids
Source: Springer Nature journal article supplement (doi:10.1038/s41586-024-08462-1), 2025-01-22
Supplement: MOESM2 [file 41586_2024_8462_MOESM2_ESM.pdf]

Reporting Summary

Nature Portfolio wishes to improve the reproducibility of the work that we publish. This form provides structure for consistency and transparency in reporting. For further information on Nature Portfolio policies, see our [Editorial Policies](#) and the [Editorial Policy Checklist](#).

Statistics

For all statistical analyses, confirm that the following items are present in the figure legend, table legend, main text, or Methods section.

|                                     |                                                                                                                                                                                                                                                                                                |
|-------------------------------------|------------------------------------------------------------------------------------------------------------------------------------------------------------------------------------------------------------------------------------------------------------------------------------------------|
| n/a                                 | Confirmed                                                                                                                                                                                                                                                                                      |
| <input type="checkbox"/>            | <input checked="" type="checkbox"/> The exact sample size ( <i>n</i> ) for each experimental group/condition, given as a discrete number and unit of measurement                                                                                                                               |
| <input type="checkbox"/>            | <input checked="" type="checkbox"/> A statement on whether measurements were taken from distinct samples or whether the same sample was measured repeatedly                                                                                                                                    |
| <input checked="" type="checkbox"/> | <input type="checkbox"/> The statistical test(s) used AND whether they are one- or two-sided<br><i>Only common tests should be described solely by name; describe more complex techniques in the Methods section.</i>                                                                          |
| <input checked="" type="checkbox"/> | <input type="checkbox"/> A description of all covariates tested                                                                                                                                                                                                                                |
| <input checked="" type="checkbox"/> | <input type="checkbox"/> A description of any assumptions or corrections, such as tests of normality and adjustment for multiple comparisons                                                                                                                                                   |
| <input type="checkbox"/>            | <input checked="" type="checkbox"/> A full description of the statistical parameters including central tendency (e.g. means) or other basic estimates (e.g. regression coefficient) AND variation (e.g. standard deviation) or associated estimates of uncertainty (e.g. confidence intervals) |
| <input checked="" type="checkbox"/> | <input type="checkbox"/> For null hypothesis testing, the test statistic (e.g. <i>F</i> , <i>t</i> , <i>r</i> ) with confidence intervals, effect sizes, degrees of freedom and <i>P</i> value noted<br><i>Give P values as exact values whenever suitable.</i>                                |
| <input checked="" type="checkbox"/> | <input type="checkbox"/> For Bayesian analysis, information on the choice of priors and Markov chain Monte Carlo settings                                                                                                                                                                      |
| <input checked="" type="checkbox"/> | <input type="checkbox"/> For hierarchical and complex designs, identification of the appropriate level for tests and full reporting of outcomes                                                                                                                                                |
| <input checked="" type="checkbox"/> | <input type="checkbox"/> Estimates of effect sizes (e.g. Cohen's <i>d</i> , Pearson's <i>r</i> ), indicating how they were calculated                                                                                                                                                          |

Our web collection on [statistics for biologists](#) contains articles on many of the points above.

Software and code

Policy information about [availability of computer code](#)

|                 |                                                     |
|-----------------|-----------------------------------------------------|
| Data collection | <input type="text" value="FlowJo (version 10)"/>    |
| Data analysis   | <input type="text" value="ImageJ (version 1.53k)"/> |

For manuscripts utilizing custom algorithms or software that are central to the research but not yet described in published literature, software must be made available to editors and reviewers. We strongly encourage code deposition in a community repository (e.g. GitHub). See the Nature Portfolio [guidelines for submitting code & software](#) for further information.

Data

Policy information about [availability of data](#)

All manuscripts must include a [data availability statement](#). This statement should provide the following information, where applicable:

- Accession codes, unique identifiers, or web links for publicly available datasets
- A description of any restrictions on data availability
- For clinical datasets or third party data, please ensure that the statement adheres to our [policy](#)

All data are available upon request from the corresponding author.

## Research involving human participants, their data, or biological material

Policy information about studies with [human participants or human data](#). See also policy information about [sex, gender \(identity/presentation\), and sexual orientation](#) and [race, ethnicity and racism](#).

|                                                                    |                                                                                                                                                                                                     |
|--------------------------------------------------------------------|-----------------------------------------------------------------------------------------------------------------------------------------------------------------------------------------------------|
| Reporting on sex and gender                                        | Females: 7785, Males: 6068                                                                                                                                                                          |
| Reporting on race, ethnicity, or other socially relevant groupings | American Indian/Alaskan Native: 59, Asian: 180, Native Hawaiian or Other Pacific Islander: 30, Black or African American: 552, White: 11090, More than One Race: 558, Unknown or Not Reported: 1384 |
| Population characteristics                                         | Pediatric Rare disease                                                                                                                                                                              |
| Recruitment                                                        | Potential participants are informed of our GA4K program by clinicians in our health system. Alternatively, participants may hear of the GA4K program by word of mouth.                              |
| Ethics oversight                                                   | Institutional Review Board (IRB) of Children's Mercy Research Institute                                                                                                                             |

Note that full information on the approval of the study protocol must also be provided in the manuscript.

## Field-specific reporting

Please select the one below that is the best fit for your research. If you are not sure, read the appropriate sections before making your selection.

☒ Life sciences ☐ Behavioural & social sciences ☐ Ecological, evolutionary & environmental sciences

For a reference copy of the document with all sections, see [nature.com/documents/nr-reporting-summary-flat.pdf](https://nature.com/documents/nr-reporting-summary-flat.pdf)

## Life sciences study design

All studies must disclose on these points even when the disclosure is negative.

|                 |                                                                                                                                                                                                                             |
|-----------------|-----------------------------------------------------------------------------------------------------------------------------------------------------------------------------------------------------------------------------|
| Sample size     | This study did not include experiments that require sample size calculations. Experiments were focused on participants in a rare disease cohort with genetic variants that are amenable to treatment with ASO therapeutics. |
| Data exclusions | No exclusions                                                                                                                                                                                                               |
| Replication     | All experiments were repeated in at least 3 biological replicates. All attempts at replication were successful.                                                                                                             |
| Randomization   | This study did not include experiments that require sample randomization                                                                                                                                                    |
| Blinding        | This study did not include experiments that require blinding.                                                                                                                                                               |

## Reporting for specific materials, systems and methods

We require information from authors about some types of materials, experimental systems and methods used in many studies. Here, indicate whether each material, system or method listed is relevant to your study. If you are not sure if a list item applies to your research, read the appropriate section before selecting a response.

### Materials & experimental systems

| n/a                                 | Involved in the study                                     |
|-------------------------------------|-----------------------------------------------------------|
| <input type="checkbox"/>            | <input checked="" type="checkbox"/> Antibodies            |
| <input type="checkbox"/>            | <input checked="" type="checkbox"/> Eukaryotic cell lines |
| <input checked="" type="checkbox"/> | <input type="checkbox"/> Palaeontology and archaeology    |
| <input checked="" type="checkbox"/> | <input type="checkbox"/> Animals and other organisms      |
| <input checked="" type="checkbox"/> | <input type="checkbox"/> Clinical data                    |
| <input checked="" type="checkbox"/> | <input type="checkbox"/> Dual use research of concern     |
| <input checked="" type="checkbox"/> | <input type="checkbox"/> Plants                           |

### Methods

| n/a                                 | Involved in the study                              |
|-------------------------------------|----------------------------------------------------|
| <input checked="" type="checkbox"/> | <input type="checkbox"/> ChIP-seq                  |
| <input type="checkbox"/>            | <input checked="" type="checkbox"/> Flow cytometry |
| <input checked="" type="checkbox"/> | <input type="checkbox"/> MRI-based neuroimaging    |

### Antibodies

|                 |                                                                                            |
|-----------------|--------------------------------------------------------------------------------------------|
| Antibodies used | OCT4, Cell Signaling, #2750<br>SOX2, Cell Signaling, #3579<br>NANOG, Cell Signaling, #3580 |
|-----------------|--------------------------------------------------------------------------------------------|

TRA-1-60, Cell Signaling, #4746  
 TRA-1-81, Cell Signaling, #4745  
 SSEA4, Cell Signaling, #4755  
 BRACHYURY, Cell Signaling, #81694  
 FOXA2, Cell Signaling, #8186  
 SOX17, Cell Signaling, #81778  
 PAX6, Cell Signaling, #60433  
 NCAM (CD56), StemCell Tech, #60021  
 NESTIN, StemCell tech, #60091  
 FOXG1, Thermofisher, PA5-26794  
 NKX2.5, Thermofisher, PA5-49431  
 Myosin Heavy Chain (MHC), Thermofisher, MA5-35613  
 HAND1, Thermofisher, MA5-25494  
 CD31, Thermofisher, MA5-13188  
 Cardiac Troponin T (TNNT2), Thermofisher, MA5-12960  
 Beta-3 Tubulin (TUJI), Thermofisher, MA1-118  
 Dystrophin, Abcam, ab15277  
 Vinculin, Invitrogen, 14-97777-82  
 Anti-Rabbit Alexa Fluor 488 Goat Fisher, A11034 1:400  
 Anti-Mouse Alexa Fluor 594 Goat Fisher, A11032 1:400  
 Anti-Mouse IRDye800CW Goat LI-COR, 926-32210 1:5000  
 Anti-Rabbit IRDye800CW Goat LI-COR, 926-32211 1:5000

#### Validation

All antibodies were validated by vendors. OCT4, NANOG were validated by chromatin IP. CD31, Vinculin were validated by knockout. TNNT2, TUJI were validated by cell treatment. All other antibodies were validated by relative expression.

## Eukaryotic cell lines

Policy information about [cell lines and Sex and Gender in Research](#)

#### Cell line source(s)

Control human iPSC line (WTC11 background) was obtained from Coriell Institute (GM25256), HEK293T cells were obtained from ATCC, Induced pluripotent stem cells derived from patients

#### Authentication

Karyotype, targeted genotyping

#### Mycoplasma contamination

Cells not tested for mycoplasma contamination

#### Commonly misidentified lines (See [ICLAC](#) register)

No commonly misidentified cell lines were used in this study

## Plants

#### Seed stocks

*Report on the source of all seed stocks or other plant material used. If applicable, state the seed stock centre and catalogue number. If plant specimens were collected from the field, describe the collection location, date and sampling procedures.*

#### Novel plant genotypes

*Describe the methods by which all novel plant genotypes were produced. This includes those generated by transgenic approaches, gene editing, chemical/radiation-based mutagenesis and hybridization. For transgenic lines, describe the transformation method, the number of independent lines analyzed and the generation upon which experiments were performed. For gene-edited lines, describe the editor used, the endogenous sequence targeted for editing, the targeting guide RNA sequence (if applicable) and how the editor was applied.*

#### Authentication

*Describe any authentication procedures for each seed stock used or novel genotype generated. Describe any experiments used to assess the effect of a mutation and, where applicable, how potential secondary effects (e.g. second site T-DNA insertions, mosaicism, off-target gene editing) were examined.*

## Flow Cytometry

### Plots

Confirm that:

- ☒ The axis labels state the marker and fluorochrome used (e.g. CD4-FITC).
- ☒ The axis scales are clearly visible. Include numbers along axes only for bottom left plot of group (a 'group' is an analysis of identical markers).
- ☒ All plots are contour plots with outliers or pseudocolor plots.
- ☒ A numerical value for number of cells or percentage (with statistics) is provided.

### Methodology

#### Sample preparation

Three days after organoid transfection organoids were dissociated using TrypLE Express (Thermofisher, 126040132). Organoids were washed once with 1xPBS and then incubated in TrypLE solution at 37 °C for 30 min. Subsequently, organoids

were dissociated into single cells by gentle pipetting. Cells were then centrifuged down to remove TrypLE and washed once with 1xPBS (300xg for 3 min). Pellets were resuspended in 1XPBS supplemented with 2% FBS and 4mM EDTA in a final volume of 300 uL and stained with 7AAD for 15 min at 4°C in the dark. Cells were washed twice with PBS/FBS/EDTA then analyzed

Instrument

BD Fortessa X-20

Software

FlowJo v10

Cell population abundance

The fraction of ASO-containing cells was measured by gating on total nucleated cells (TNC; FSC/SSC), live cells (7AAD negative), then percentage of fluorescence positive cells in the FITC channel. An untransfected control was used to subtract baseline fluorescence intensity.

Gating strategy

The fraction of ASO-containing cells was measured by gating on total nucleated cells (TNC; FSC/SSC), live cells (7AAD negative), then percentage of fluorescence positive cells in the FITC channel. An untransfected control was used to subtract baseline fluorescence intensity.

☒ Tick this box to confirm that a figure exemplifying the gating strategy is provided in the Supplementary Information.
